# Supplementary material for: A novel pH-responsive Fe-MOF system for enhanced cancer treatment mediated by the Fenton reaction
Source: Royal Society of Chemistry journal article supplement (doi:10.1039/d0nj05105e), 2021-01-01
Supplement: d0nj05105e1.pdf [file d0nj05105e1.pdf]

## A Novel pH-responsive Fe-MOF System for Enhanced Cancer Treatment Mediated by Fenton Reaction

Senlin Wang<sup>‡<sup>a</sup></sup>, Hongshuai Wu<sup>‡<sup>a</sup></sup>, Kai Sun<sup>a</sup>, Jinzhong Hu<sup>a</sup>, Fanghui Chen<sup>a</sup>, Wen Liu<sup>a</sup>,  
Jian Chen<sup>a</sup>, Baiwang Sun<sup>a,\*</sup> and Abul Monsur Showkot Hossain<sup>b,\*</sup>

<sup>a</sup> School of Chemistry and Chemical Engineering, Southeast University, Nanjing  
211189, PR China. E-mail address: chmsunbw@seu.edu.cn

<sup>b</sup> School of Chemistry and Chemical Engineering, Jiangsu University, Zhenjiang,  
Jiangsu 212013, PR China. E-mail address: monsur\_12@yahoo.com

<sup>‡</sup> These authors have contributed equally to the work.

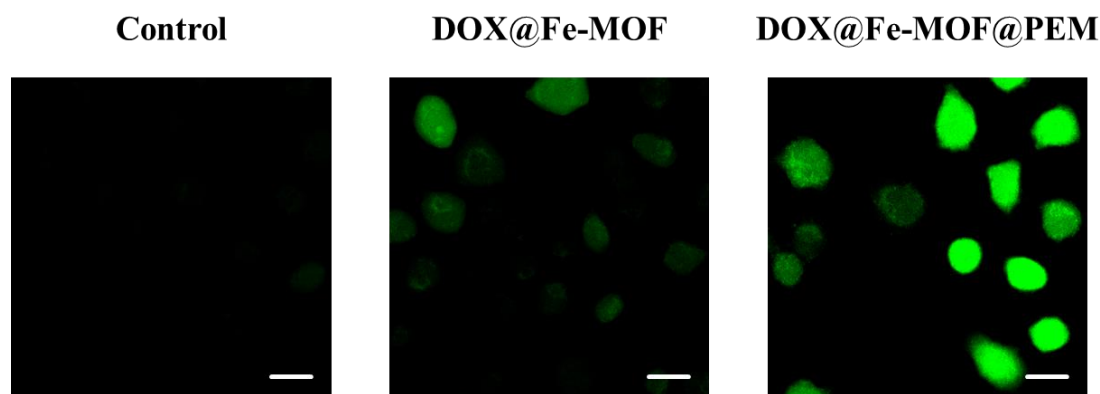

**Fig. S1.** ROS intensity of A549 cells induced by DOX@Fe-MOF and DOX@Fe-MOF@PEM achieved by CLSM. Scale bar: 20  $\mu$ m.

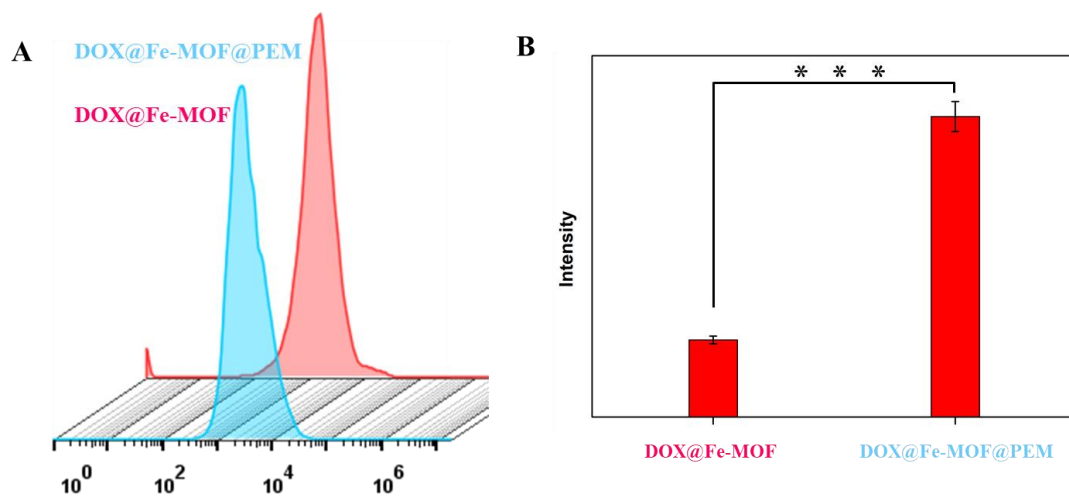

**Fig. S2.** (A) The DOX uptake profile of the A549 cells cultured with DOX@Fe-MOF and DOX@Fe-MOF@PEM by flow cytometry; (B) the analysis of flow cytometry data.  $n = 3$ , mean  $\pm$  SD; \*\*\*,  $p < 0.001$ .
